# Supplementary material for: Antituberculosis, antimicrobial, antioxidant, cytotoxicity and anti-inflammatory activity of Schiff base derived from 2,3-diaminophenazine moiety and its metal(II) complexes: structural elucidation, computational aspects, and biological evaluation
Source: publisher site journal article supplement (doi:10.1515/revic-2024-0007), 2024-07-29
Supplement: Supplementary file 1 [file j_revic-2024-0007_suppl_001.docx]

**Antituberculosis, Antimicrobial, Antioxidant, Cytotoxicity and Anti-Inflammatory Activity of Schiff Base Derived from 2,3-Diaminophenazine Moiety and its Metal(II) Complexes: Structural Elucidation, Computational Aspects, and Biological Evaluation**

**Saleh M. Bufarwa1*, Reem M. El-Sefait2, Dalal K. Thbayh3, Mustapha Belaidi4, Rehab K. Al-Shemary5, Rema. M. Abdusamea2, Marei M. El-Ajaily6, Bela Fiser7, Hanan A. Bader1, Abdulsalam A. Saleh8, Mohamad M. Bufarwa9**

1Chemistry Department, Omar Al-Mukhtar University, El-Beida City, Libya

2Natural Resources and Environmental Sciences, Omar Al-Mukhtar University, El-Beida City, Libya

3Polymer research center, Basrah University, Basrah, Iraq

4Chemistry, Laboratory Environment and Sustainable Development Department, Ahmed Zabana University, 48000, Relizane-Algeria.

5Chemistry Department, Baghdad University, Baghdad City, Iraq

6Chemistry Department, Benghazi University, Benghazi City, Libya

7Biology and Chemistry Department, Ferenc Rákóczi II Transcarpathian Hungarian College of Higher Education, Transcarpathia, 90200 Berezszáz, Ukraine

8Perventive Medicine and Public Health Department, Omar Al-Mukhtar University, El-Beida City, Libya

9College of Education, Omar Al University, El-Beida City, Libya


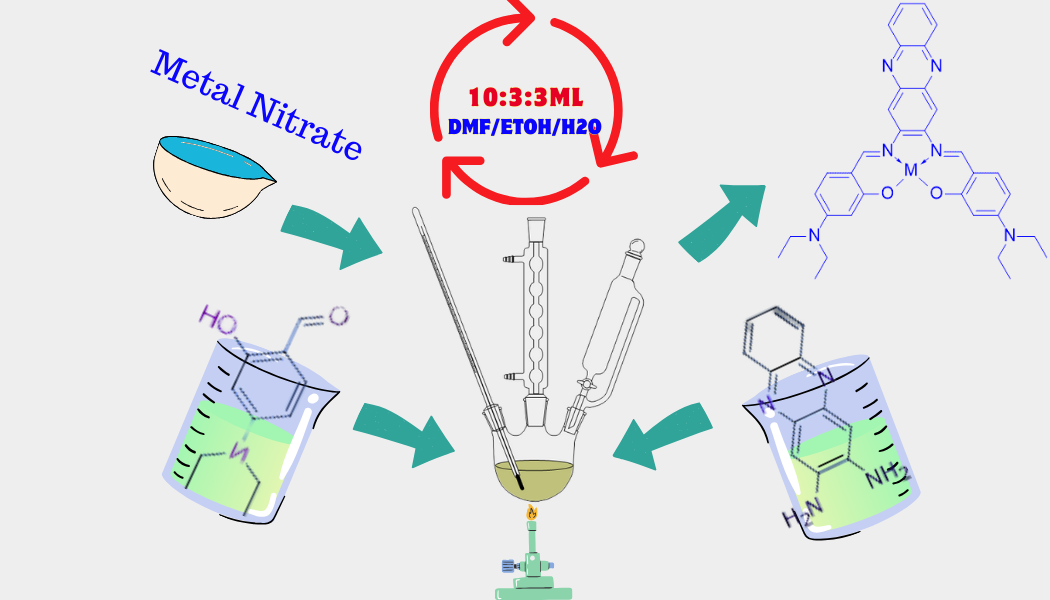


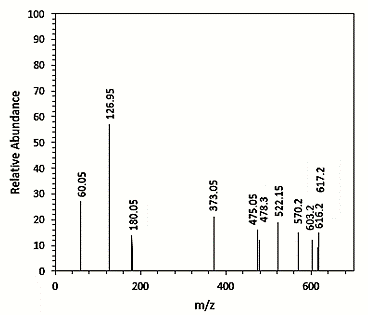


**Figure(S1):** Mass spectra of Co(II)complex


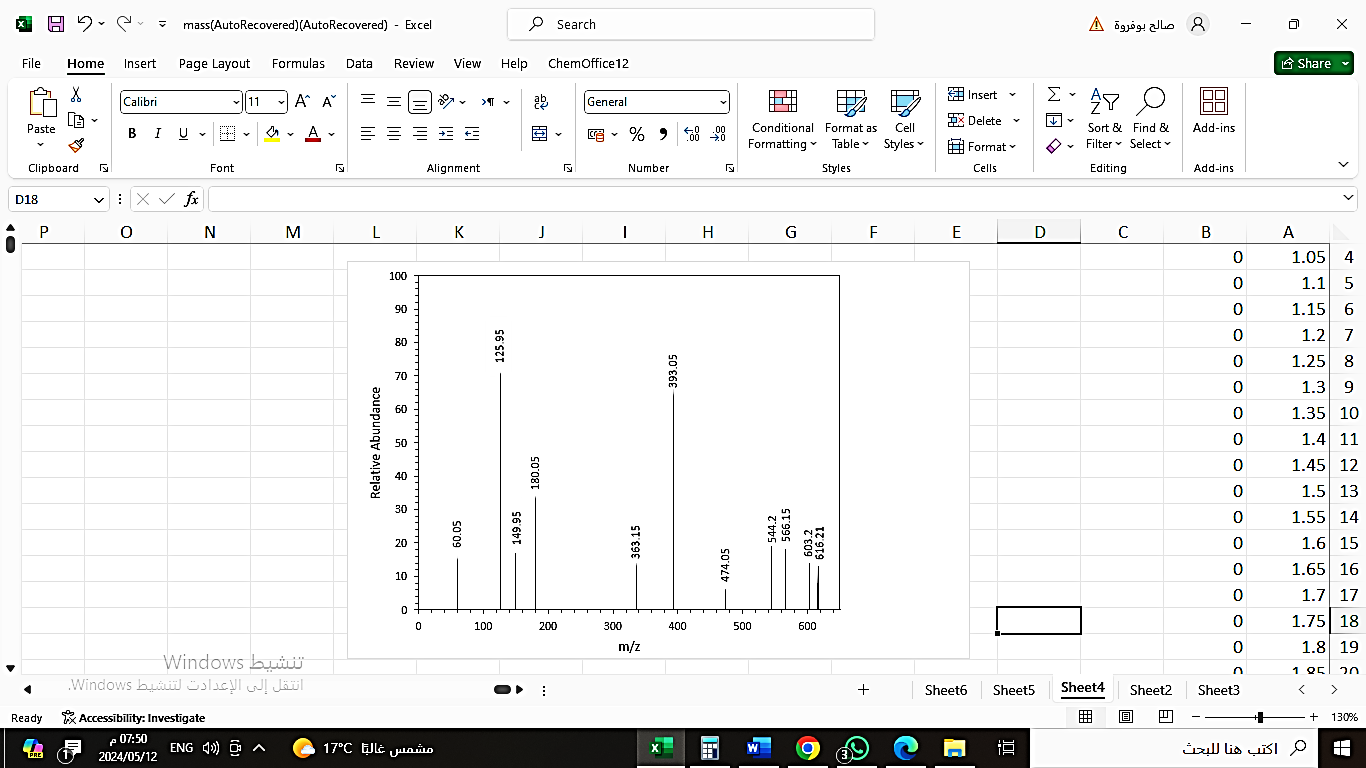


**Figure(S2):** Mass spectra of Ni(II) complex


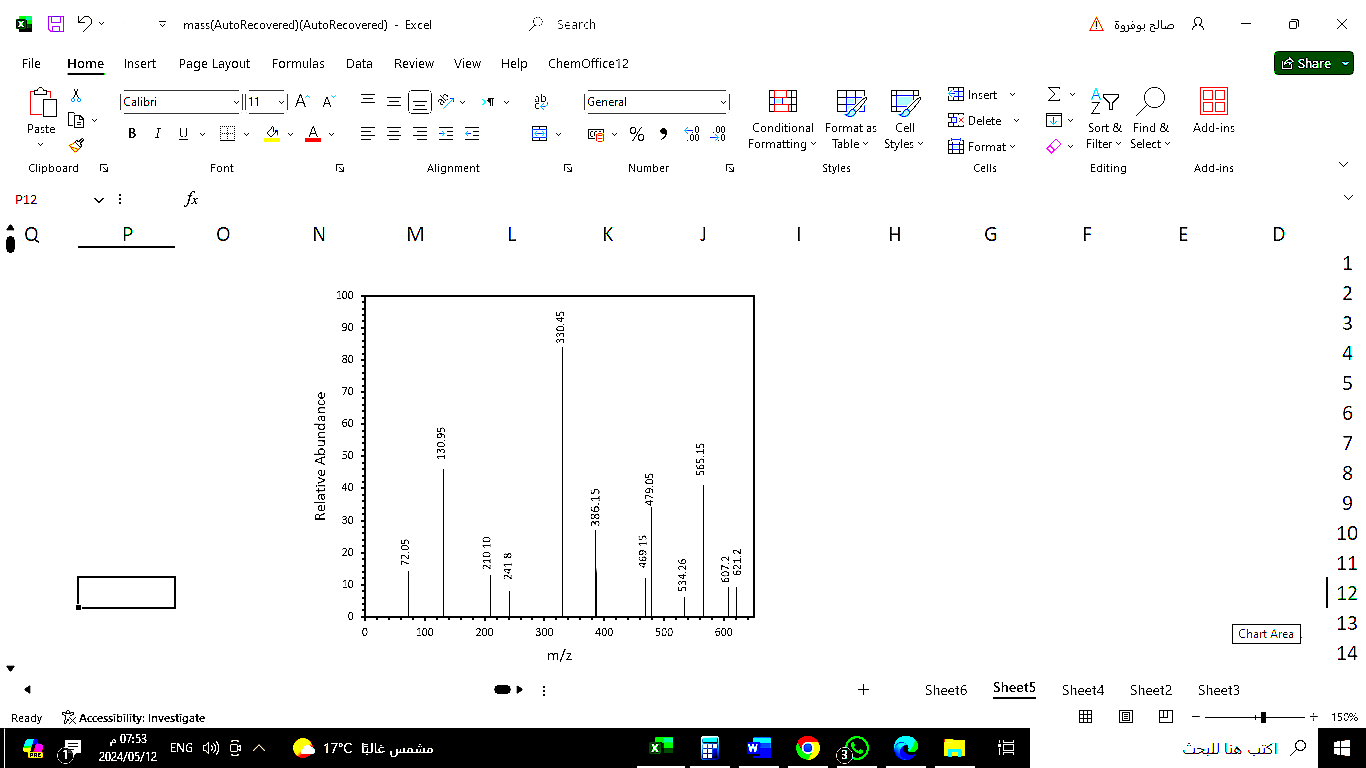


**Figure(S3):** Mass spectra of Cu(II) complex


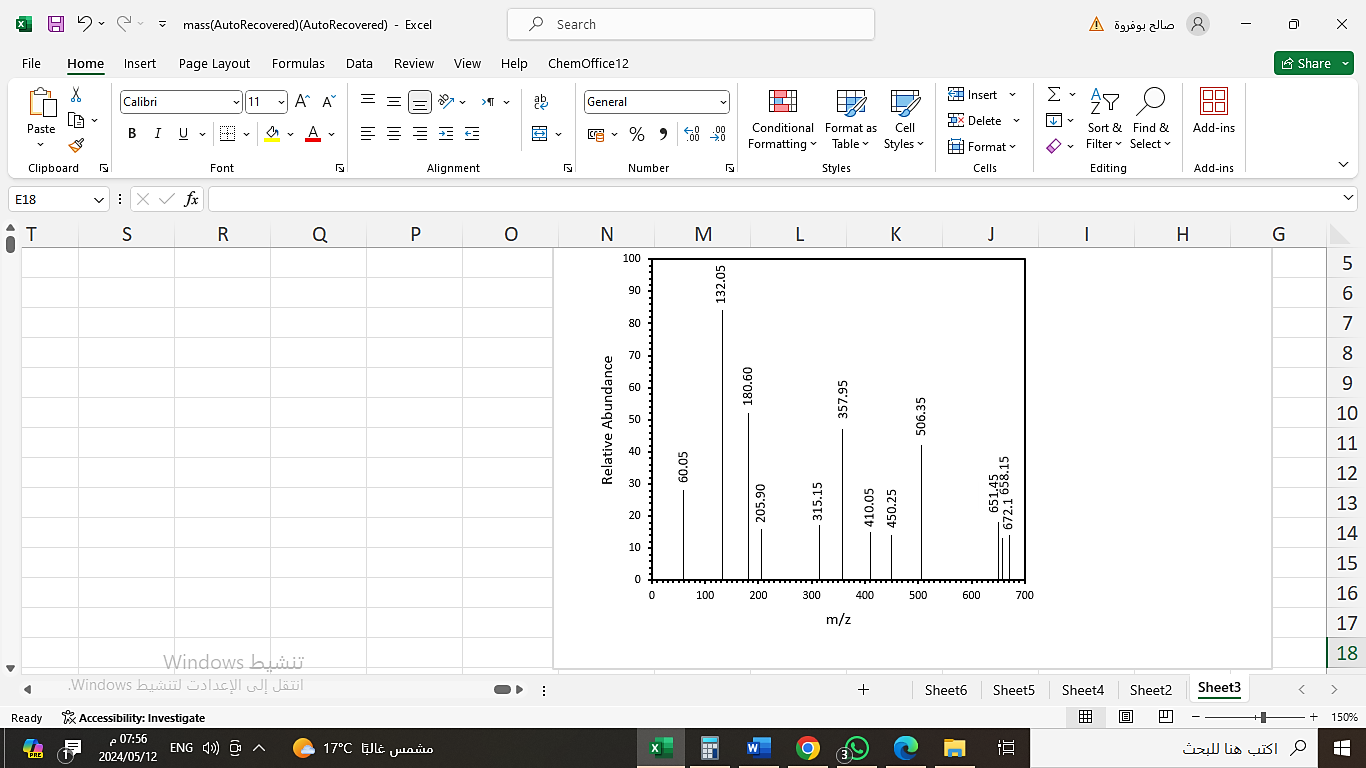


**Figure(S4):** Mass spectra of Cd(II) complex

| 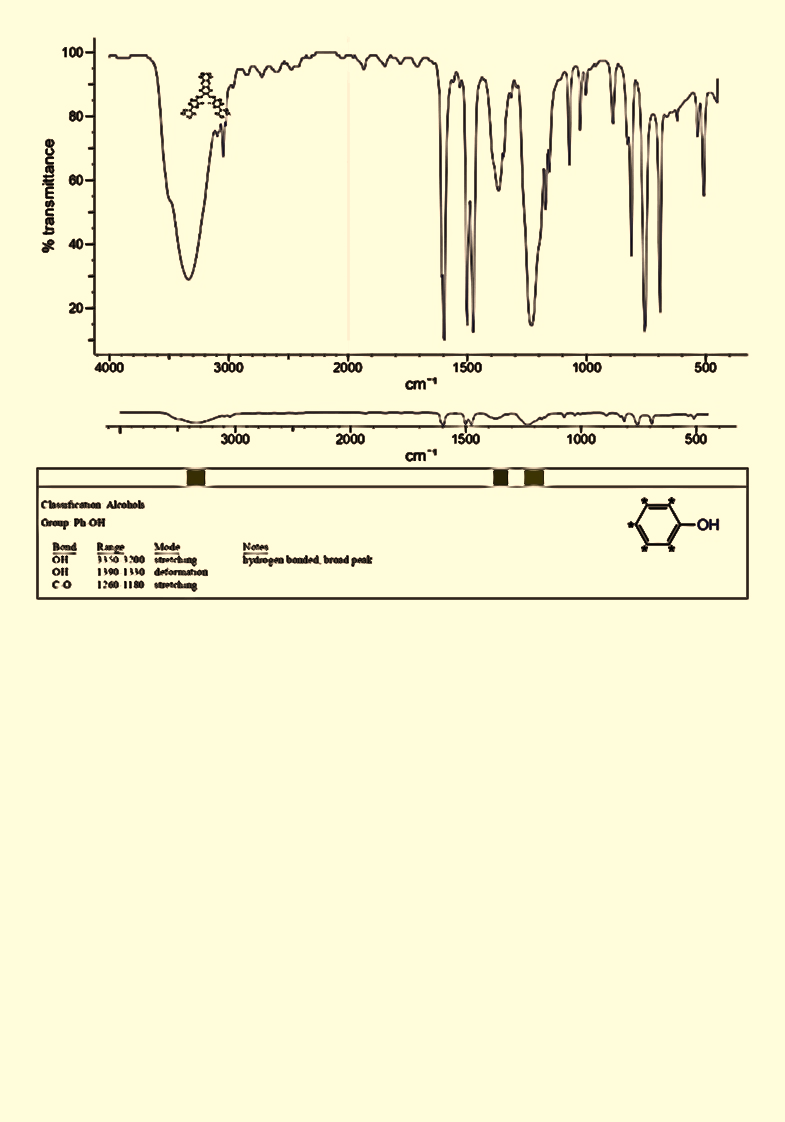 | 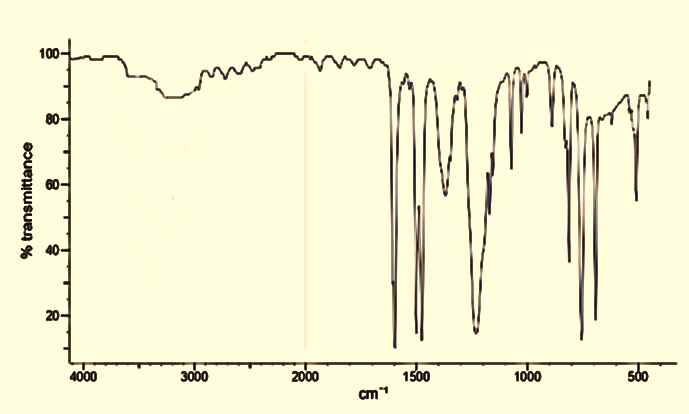 |
| --- | --- |
| (**a**) | (**b**) |
| 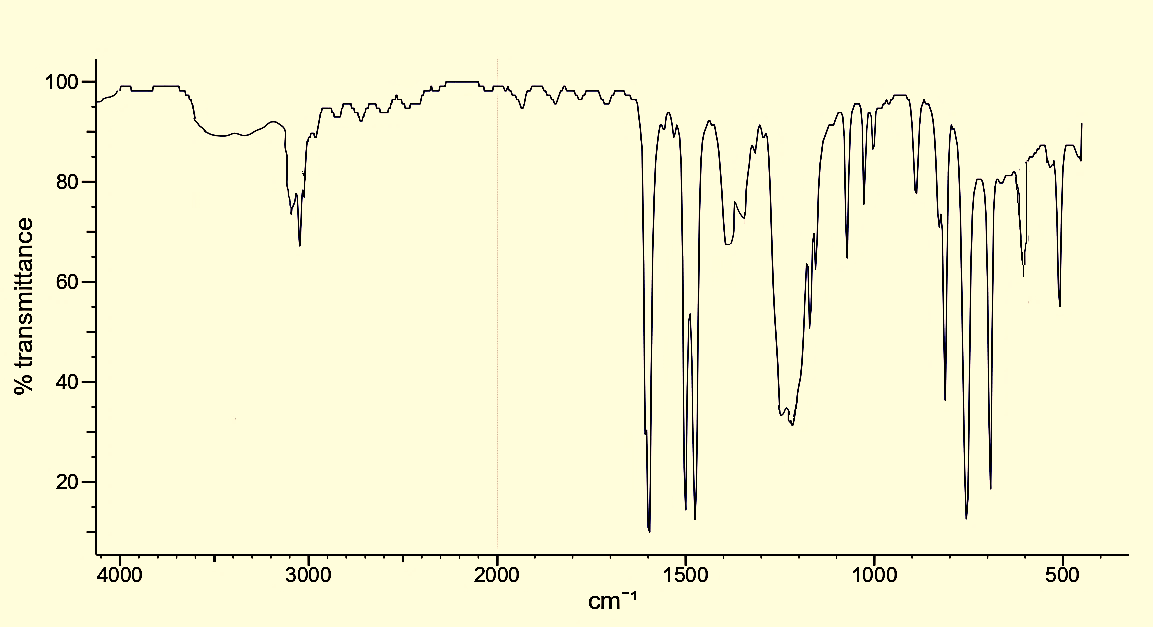 | 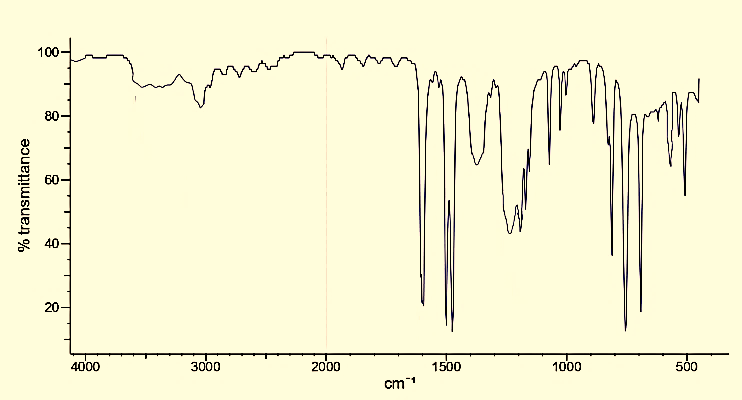 |
| (**c**) | (**d**) |
| 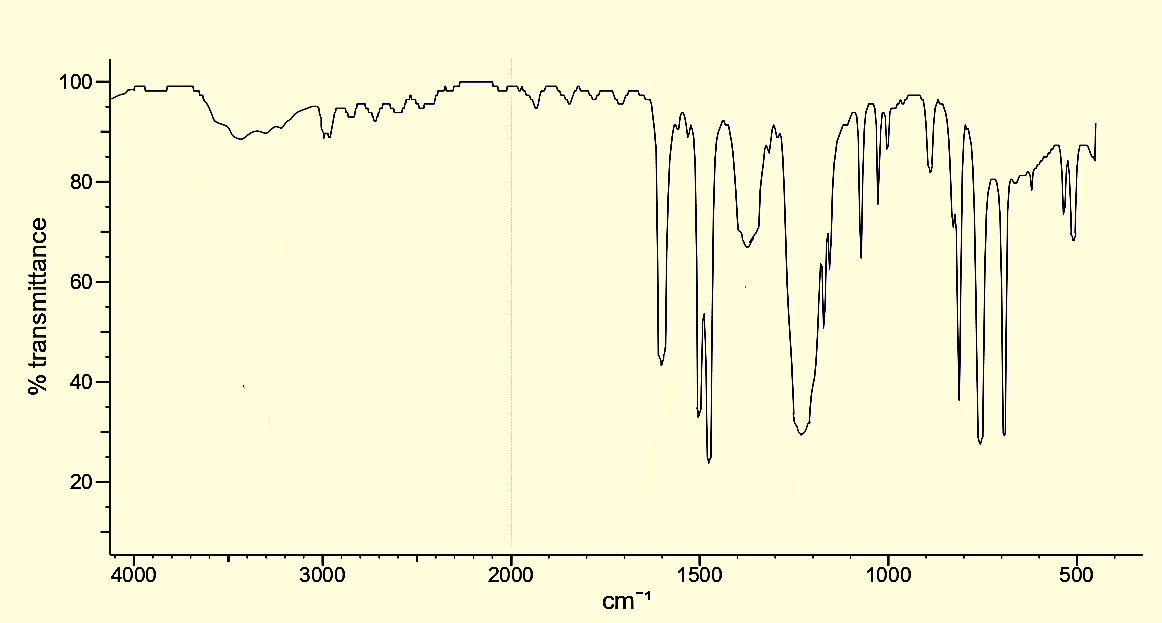 | |
| (**e**) | |

**Fig (S5).** FT-IR spectra of (a) **H2L**; (b) **C1**; (c) **C2**; (d) **C3**; and (e) **C4**


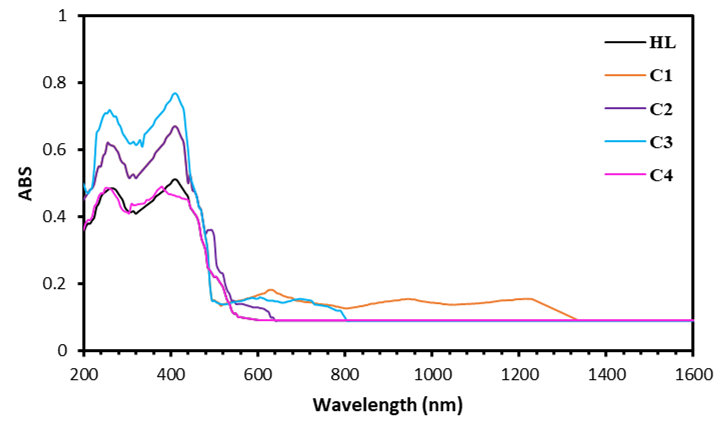


**Fig (S6).** FT-IR spectra of (a) **H2L**; (b) **C1**; (c) **C2**; (d) **C3**; and (e) **C4**

| 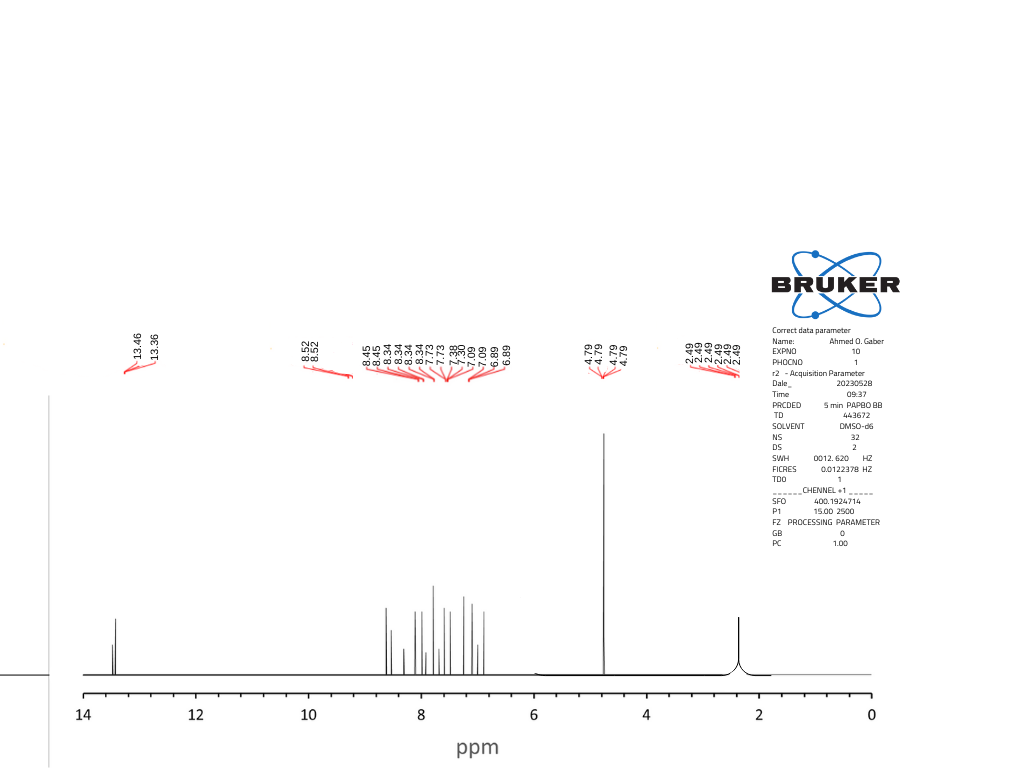 |
| --- |
| (**a**) |
| 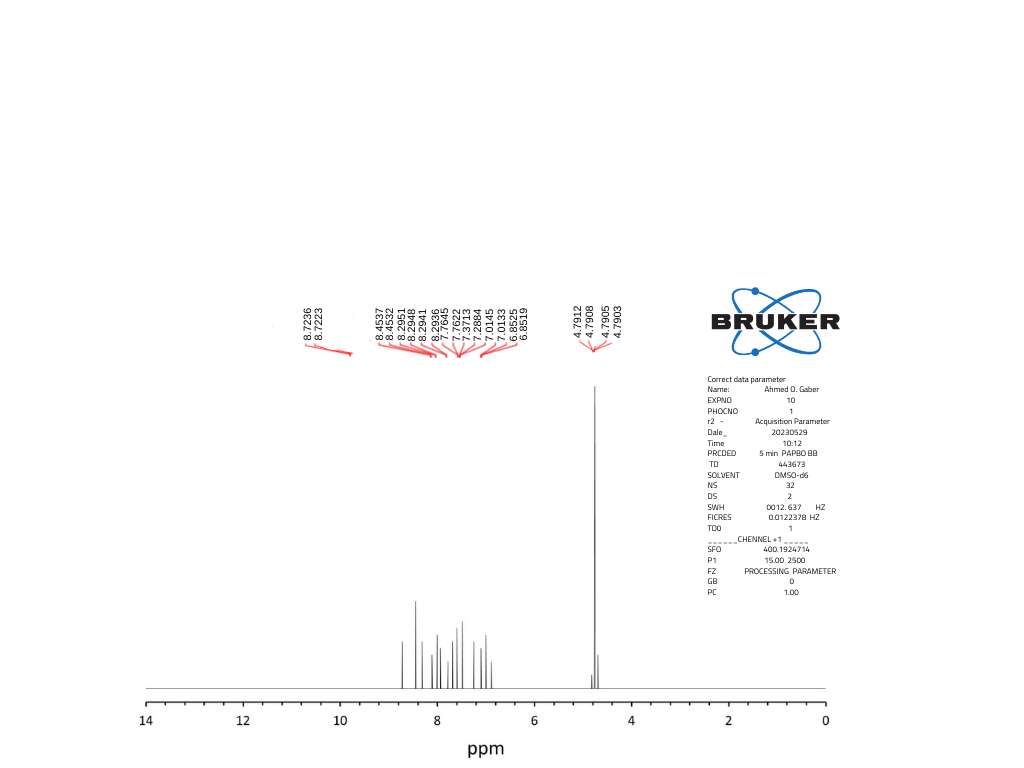 |
| **(b)** |

**Figure(S7):** (a)1HNMR spectra of ligand (b) Cd(II) complex

| 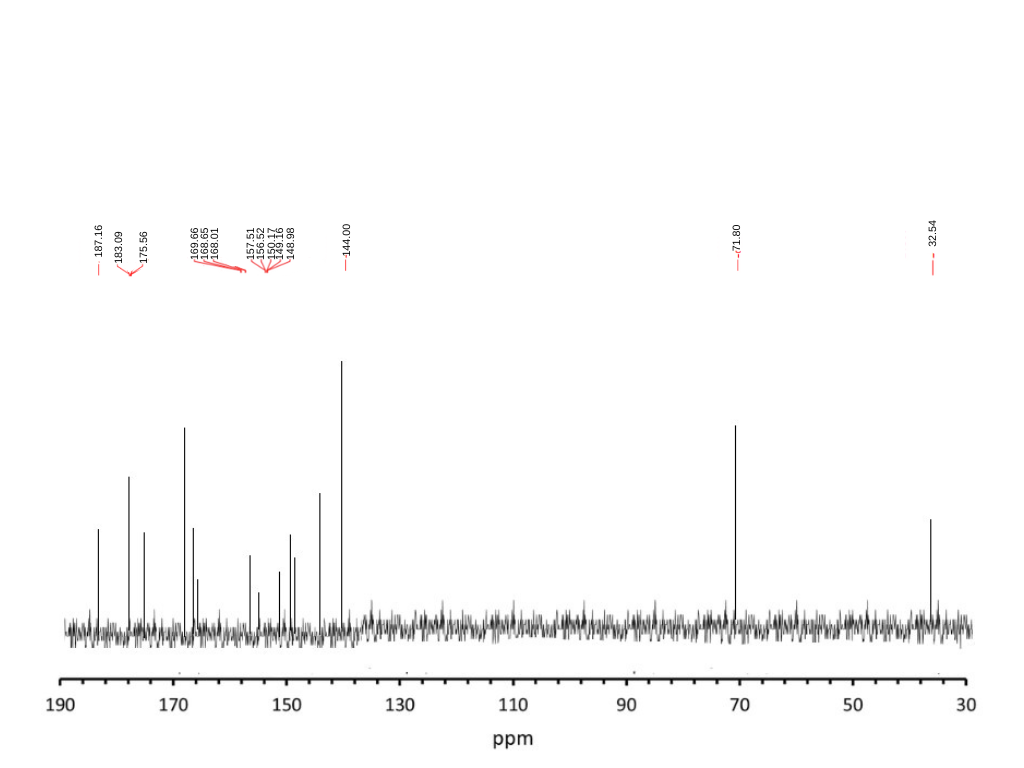 |
| --- |
| (**a**) |
| 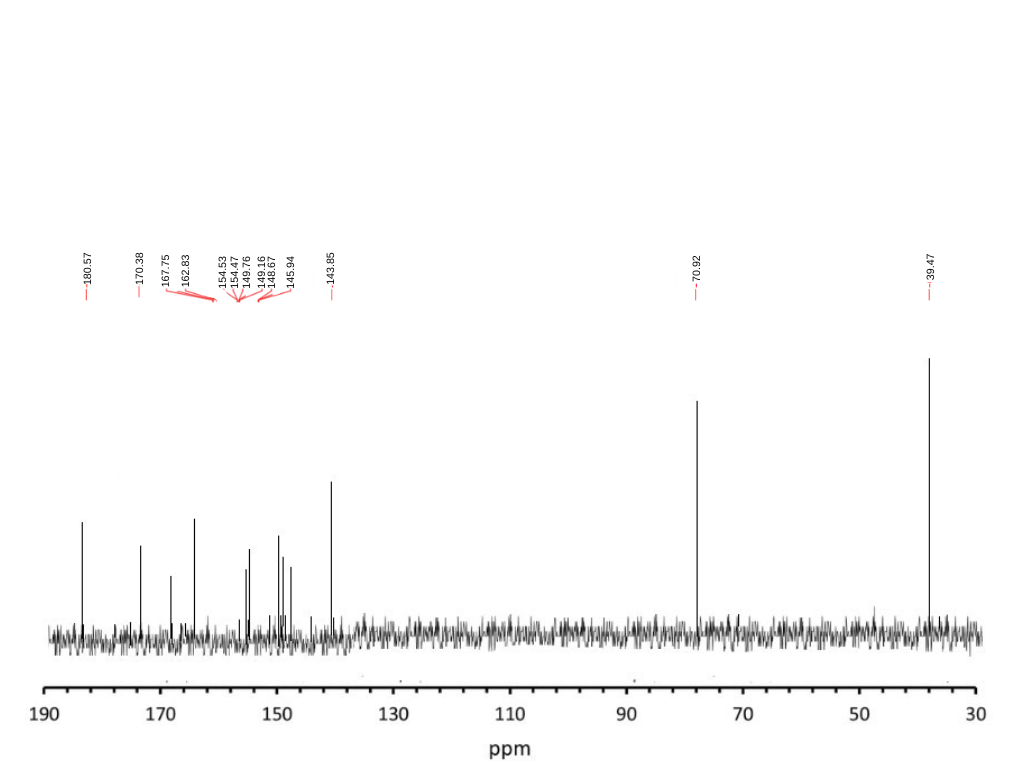 |
| **(b)** |

Figure (S8) 13CNMR spectra of (a) ligand (b) Cd(II) complex

**Table(S2)** The selected bond length (Ao) of complexes

| **Length (Ao)** | **Bond order** | **End atom** | **Start Atom** | **Type** |  |
| --- | --- | --- | --- | --- | --- |
| 1.3497 | 1 | C1 | O1 | O-C | **HL** |
| 0.9679 | 1 | H1 | O1 | O-H |
| 1.3518 | 1 | C2 | O2 | O-C |
| 0.96118 | 1 | H2 | O2 | O-H |
| 1.4088 | 1 | C3 | C1 | C-C |
| 1.4046 | 2 | C4 | C1 | C-C |
| 1.4202 | 1 | C5 | C4 | C-C |
| 1.3952 | 1 | C7 | C6 | C-C |
| 1.3985 | 2 | C3 | C7 | C-C |
| 1.4217 | 1 | C8 | C2 | C-C |
| 1.4016 | 2 | C9 | C8 | C-C |
| 1.3937 | 1 | C10 | C9 | C-C |
| 1.4157 | 2 | C11 | C10 | C-C |
| 1.4020 | 2 | C12 | C2 | C-C |
| 1.4185 | 1 | C12 | C11 | C-C |
| 1.2912 | 2 | C13 | N1 | N-C |
| 1.4871 | 1 | C3 | C13 | C-C |
| 1.2887 | 2 | C14 | N2 | N-C |
| 1.4133 | 1 | C15 | C16 | C-C |
| 1.4136 | 2 | C17 | C15 | C-C |
| 1.3602 | 1 | N3 | C19 | C-N |
| 1.3602 | 1 | N4 | C20 | C-N |
| 1.359 | 2 | C21 | N3 | N-C |
| 1.359 | 2 | C22 | N4 | N-C |
| 1.332 | 1 | C1 | O1 | O-C | **C1** |
| 1.333 | 1 | C2 | O2 | O-C |
| 1.338 | 2 | C3 | C1 | C-C |
| 1.397 | 2 | C4 | C1 | C-C |
| 1.414 | 1 | C5 | C4 | C-C |
| 1.418 | 2 | C6 | C5 | C-C |
| 1.403 | 2 | C9 | C8 | C-C |
| 1.399 | 1 | C10 | C9 | C-C |
| 1.417 | 2 | C11 | C10 | C-C |
| 1.299 | 2 | C14 | N2 | N-C |
| 1.430 | 1 | C15 | N1 | N-C |
| 1.417 | 2 | C17 | C15 | C-C |
| 1.359 | 2 | C21 | N3 | N-C |
| 1.358 | 2 | C22 | N4 | N-C |
| 1.360 | 1 | N3 | C19 | C-N |
| 1.360 | 1 | N4 | C20 | C-N |
| 1.802 | 1 | Co | O1 | O-Co |
| 1.804 | 1 | O2 | Co | Co-O |
| 1.926 | 1 | N1 | Co | Co-N |
| 1.923 | 1 | N2 | Co | Co-N |
| 1.332 | 1 | C1 | O1 | O-C | C2 |
| 1.333 | 1 | C2 | O2 | O-C |
| 1.338 | 2 | C3 | C1 | C-C |
| 1.397 | 2 | C4 | C1 | C-C |
| 1.414 | 1 | C5 | C4 | C-C |
| 1.418 | 2 | C6 | C5 | C-C |
| 1.403 | 2 | C9 | C8 | C-C |
| 1.399 | 1 | C10 | C9 | C-C |
| 1.417 | 2 | C11 | C10 | C-C |
| 1.299 | 2 | C14 | N2 | N-C |
| 1.430 | 1 | C15 | N1 | N-C |
| 1.417 | 2 | C17 | C15 | C-C |
| 1.359 | 2 | C21 | N3 | N-C |
| 1.481 | 1 | C33 | N5 | N-C |
| 1.360 | 1 | N3 | C19 | C-N |
| 1.360 | 1 | N4 | C20 | C-N |
| 1.765 | 1 | Ni | O1 | O-Ni |
| 1.766 | 1 | O2 | Ni | Ni-O |
| 1.886 | 1 | N1 | Ni | Ni-N |  |
| 1.883 | 1 | N2 | Ni | Ni-N |
| 1.359 | 1 | C1 | O1 | O-C | C3 |
| 1.359 | 1 | C2 | O2 | O-C |
| 1.434 | 1 | C3 | C1 | C-C |
| 1.400 | 2 | C4 | C1 | C-C |
| 1.397 | 2 | C9 | C8 | C-C |
| 1.418 | 2 | C10 | C9 | C-C |
| 1.400 | 2 | C12 | C2 | C-C |
| 1.280 | 2 | C13 | N1 | N-C |
| 1.280 | 2 | C14 | N2 | N-C |
| 1.426 | 1 | C15 | N1 | N-C |
| 1.426 | 1 | C16 | N2 | N-C |
| 1.482 | 1 | C33 | N5 | N-C |
| 1.822 | 1 | Cu | O1 | O-Cu |
| 1.822 | 1 | O2 | Cu | Cu-O |
| 1.851 | 1 | N1 | Cu | Cu-N |
| 1.851 | 1 | N2 | Cu | Cu-N |
| 1.355 | 1 | C1 | O1 | O-C | C4 |
| 1.355 | 1 | C2 | O2 | O-C |
| 1.430 | 1 | C3 | C1 | C-C |
| 1.419 | 1 | C5 | C4 | C-C |
| 1.416 | 2 | C6 | C5 | C-C |
| 1.416 | 2 | C11 | C10 | C-C |
| 1.400 | 2 | C12 | C2 | C-C |
| 1.419 | 1 | C12 | C11 | C-C |
| 1.285 | 2 | C13 | N1 | N-C |
| 1.285 | 2 | C14 | N2 | N-C |
| 1.429 | 1 | C15 | N1 | N-C |
| 1.429 | 1 | C16 | N2 | N-C |
| 1.482 | 1 | C33 | N5 | N-C |
| 1.938 | 1 | Cd | O1 | O-Cd |
| 1.938 | 1 | O2 | Cd | Cd-O |
| 1.968 | 1 | N1 | Cd | Cd-N |
| 1.968 | 1 | N2 | Cd | Cd-N |
